# 1 **Association of gut microbiota with metabolism in juvenile Atlantic Salmon**

2 Dvergedal, H.<sup>1</sup>, Sandve, S.R.<sup>1\*</sup>, Angell, I.L.<sup>2</sup>, Klemetsdal, G.<sup>1</sup>, Rudi, K.<sup>2</sup>

3

4 <sup>1</sup>Department of Animal and Aquacultural Sciences, Faculty of Biosciences, Norwegian University  
5 of Life Sciences, P. O. Box 5003, NO-1433, Aas, Norway

6 <sup>2</sup>Faculty of Chemistry, Biotechnology and Food Science, Norwegian University of Life Sciences,  
7 P. O. Box 5003, NO-1433, Aas, Norway

8

9 \*Correspondence: Simen Rød Sandve, Norwegian University of Life Sciences, NO-1433 Aas,  
10 Norway. **[simen.sandve@nmbu.no](mailto:simen.sandve@nmbu.no)**

## 11 **Abstract**

12 The gut microbiome plays a key role in animal health and metabolism through the intricate  
13 functional interconnection between the feed, gut microbes, and the host. Unfortunately, in  
14 aquaculture, the links between gut microbes and fish genetics and production phenotypes are not  
15 well understood.

16 In this study, we investigate the associations between gut microbial communities, fish feed  
17 conversion, and fish genetics in the domestic Atlantic salmon. Microbial community composition  
18 was determined for 230 juvenile fish from 23 full-sib families and was then regressed on growth,  
19 carbon and nitrogen metabolism, and feed efficiency. We only found weak associations between  
20 host genetics and microbial composition. However, we did identify significant ( $p < 0.05$ )  
21 associations between the abundance of three microbial operational taxonomical units (OTUs) and  
22 fish metabolism phenotypes. Two OTUs were associated with both carbon metabolism in adipose  
23 tissue and feed efficiency, while a third OTU was associated with weight gain.

24 In conclusion, this study demonstrates an intriguing association between host lipid metabolism and  
25 the gut microbiota composition in Atlantic salmon.

26

27 *Keywords: microbiome, Atlantic salmon, genetics, metabolism, feed efficiency, carbon turnover*

28

29

30

## 31 **Background**

32 Efficient and environmentally sustainable animal production systems are urgently required to  
33 ensure long-term food security, especially as global aquaculture consumption is projected to  
34 double by 2050 ([www.fao.org](http://www.fao.org)). One important aspect of improving sustainability is to improve  
35 feed conversion and growth. In humans and other vertebrate systems, the gut microbiome plays a  
36 central role in the path from “feed-to-animal” (1–4), and recent studies have also shown that host-  
37 genetic factors can modulate microbiome composition. Such functional interconnection between  
38 feed, microbes, and host (i.e. the feed-microbiome-host axis), opens up intriguing avenues for  
39 optimizing aquaculture production systems, for example by breeding for ‘optimized’ microbiome  
40 composition (5).

41 Yet, even though the dietary composition is known to impact the gut microbiome in aquaculture  
42 species (1), almost nothing is known about the link between the gut microbiota and important  
43 production phenotypes, or to what extent microbiota composition itself could be a new breeding  
44 target for aquaculture breeding programs (5).

45 To address this pressing knowledge gap we use a family-based experimental design to test if  
46 variation in the gut microbiome composition in juvenile Atlantic salmon is associated with key  
47 phenotypes related to host metabolism as well as variation in host genetics. Our results identified  
48 phenotypic associations between host gut microbiome and lipid metabolism, growth, as well as to  
49 feed efficiency, which open the possibility for metabolic modulation through the gut microbiota.

50

51

52

53

## 54 **Materials and methods**

### 55 **Experimental setup**

56 A family experiment with Atlantic salmon was carried out at the fish laboratory, Norwegian  
57 University of Life Sciences (NMBU), Aas, Norway, according to the laws and regulations  
58 controlling experiments on live animals in EU (Directive 2010/637EU) and Norway (FOR-2015-  
59 06-18-761). The experiment was approved by the Norwegian Food Safety Authority (FOTS ID  
60 11676).

61 The family experiment is explained in detail by Dvergedal et al (6). In short, broodstock from  
62 AquaGen's breeding population (22 males and 23 females) were used to generate 23 families. To  
63 ensure clearly contrasted family groups with respect to growth potential, the parents were selected  
64 in two directions for high and low estimated breeding values (EBVs) for growth in seawater,  
65 respectively.

66 Prior to the start-feeding several families were kept in separate compartments within the same  
67 tank, and five tanks were needed to house all families. Based on parentage assignment 100 family  
68 members were identified for each of the 23 families and reared together in a single tank from start-  
69 feeding until the start of the experiment. *A priori* to the 12-day test, families were allocated to  
70 tanks, 50 fish per tank and 2 tanks per family (except for nine tanks in which the number of fish  
71 varied between 42 and 54, due to some mortality prior to the start of the experiment or an increased  
72 number due to a counting mistake). From each tank five fish (10 fish per family) were collected  
73 for microbiota and phenotypic analyses, a total of 230 fish were sampled all together (Fig. 1).  
74 Families were fed a fishmeal-based diet labeled with the stable isotopes  $^{15}\text{N}$  and  $^{13}\text{C}$ , with inclusion  
75 levels of 2% and 1%, respectively, as described in Dvergedal et al. (6).

76 The tanks, each with a 270-L capacity, were supplied with water from a common source of  
77 recirculated fresh water, at a flow rate of 7 to 8 L.min<sup>-1</sup>. The fish were kept under 24 h light regime,  
78 with an average temperature of 14.5°C. Dissolved oxygen was measured daily and maintained  
79 above 8 mg.L<sup>-1</sup> in the outlet water (Handy Delta, OxyGuard® AS, Farum, Denmark).

80

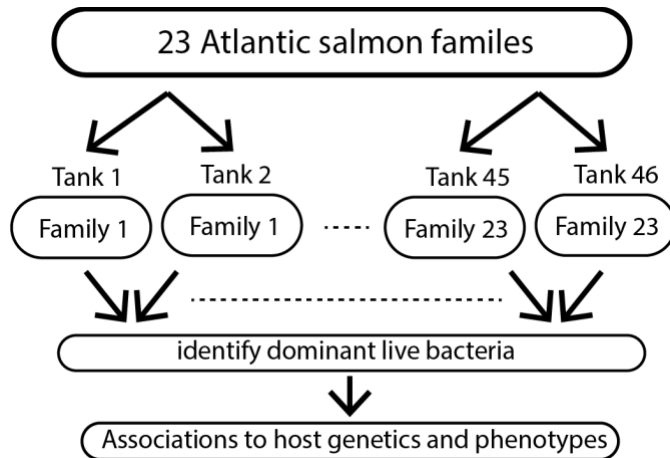

81

82 **Figure 1. Schematic outline of the experimental setup.** Twenty-three families were distributed on 46 tanks (two  
83 tanks per family). Dominant live bacteria were identified prior to association analyses to fish genetics and metabolism.

84

## 85 Microbiota analyses

86 Distal intestinal samples (n = 230) were obtained by squeezing out the gut segment content using  
87 sterile tweezers in 1 ml phosphate buffered saline (PBS) and put on ice until further processing.

88 To distinguish between DNA from dead and alive bacteria, the samples were treated with  
89 propidium monoazide (PMA) within eight hours post sampling in order to inactivate free DNA,

90 and DNA in dead cells (7). Samples were pulse centrifuged up to 1200 rpm and split in two, where  
91 one part (n = 230, PMA treated samples) was added PMA dye (Biotium, USA to a final

92 concentration of 50 µM, and the other part was kept as a control (n = 230, non-PMA treated  
93 samples) with no added PMA. The samples were then kept dark for 5 min before exposure to light

94 for 30 min in a lightbox from Geniul. DNA extraction (n = 460) was done using mag midi DNA  
95 extraction kit (LGC Genomics, UK) following the manufacturer's recommendations.

96 The 16S rRNA amplicon library was prepared and sequenced as previously described (8). Briefly,  
97 this involved amplification in 25- $\mu$ l volumes, with 0.2  $\mu$ M of both primers, and 2  $\mu$ l genomic  
98 DNA. The PCR cycles involved denaturation at 95°C for 30 s, annealing at 55°C for 30 s, with an  
99 initial heat activation at 95°C for 15 min. Illumina modified adapters added with 10 new PCR  
100 cycles after purification with AMPure XP beads (Beckman-Coulter, USA) were. Negative controls  
101 without genomic DNA were included on all PCR plates (n=5), and included in sequencing if giving  
102 detectable band by agarose gel electrophoresis. The sequence reads were processed using  
103 USEARCH v8 (9) where the sequences were paired-end joined, demultiplexed, and quality  
104 filtered (maxxee = 1.0, minlength = 350, singletons discarded), before operational taxonomic unit  
105 (OTU) clustering with 97% identity threshold was performed using the UPARSE pipeline (10).  
106 Taxonomy assignment was done using SILVA database (11). Diversity analysis was done using a  
107 sequence depth of 10 000 sequences per sample. These analyses were done using default  
108 parameters.

109 To filter out OTUs from dead bacteria and bacteria considered as contaminants, filtering was done  
110 using the following criteria on each individual fish gut microbiome; OTUs which showed a more  
111 than 3-fold reduction in the PMA treated sample was considered dead, while OTUs that showed a  
112 more than 6-fold increase in the non PMA treated sample were considered contaminants because  
113 there were no other alternative explanations. Out of the 230 fish gut microbiomes, 188 passed the  
114 sequence quality control filtering criteria, including rarefaction at 10 000 sequences as a tradeoff  
115 between number of samples and sequencing dept, in addition to live/dead/contamination screening.

116 Correlations between OTUs were determined using Spearman's rank correlation coefficient. Raw

117 16S rRNA sequence data are deposited in the SRA database under the accession number  
118 PRJNA590084.

119

## 120 **Phenotypic data**

121 The host metabolism related traits analyzed are listed in Table 1. Details for phenotypic data for  
122 growth and metabolic traits are explained in Dvergedal et al. (6).

123 **Table 1.** Description of the 13 variables phenotyped.

| No. | Variables | Description                                                                                         |
|-----|-----------|-----------------------------------------------------------------------------------------------------|
| 1   | IW        | Initial weight <sup>2</sup>                                                                         |
| 2   | FW        | Final weight <sup>2</sup>                                                                           |
| 3   | WG        | Weight gain <sup>2</sup> (FW-IW)                                                                    |
| 4   | RG        | Relative weight gain (%) (((FW-IW)/FW)100)                                                          |
| 5   | AMC       | Atom % <sup>13</sup> C in muscle                                                                    |
| 6   | AMN       | Atom % <sup>15</sup> N in muscle                                                                    |
| 7   | ALC       | Atom % <sup>13</sup> C in liver                                                                     |
| 8   | ALN       | Atom % <sup>15</sup> N in liver                                                                     |
| 9   | AAC       | Atom % <sup>13</sup> C in adipose tissue                                                            |
| 10  | IFCR_AMC  | Individual isotope-based indicator of feed conversion ratio, from Atom % <sup>13</sup> C in muscle  |
| 11  | IFCR_AMN  | Individual isotope-based indicator of feed conversion ratio, from Atom % <sup>15</sup> N in muscle  |
| 12  | IFER_AMC  | Individual isotope-based indicator of feed efficiency ratio, from Atom % <sup>13</sup> C in muscle  |
| 13  | IFER_AMN  | Individual isotope-based indicator, of feed efficiency ratio, from Atom % <sup>15</sup> N in muscle |
| 14  | OTU1      | Operational taxonomic unit 1, classified as <i>Caulobacteriaceae</i>                                |
| 15  | OTU2      | Operational taxonomic unit 2 classified as <i>Pseudomonas fluorescens</i>                           |
| 16  | OTU3      | Operational taxonomic unit 3 classified as <i>Sphingomonas</i>                                      |
| 17  | OTU5      | Operational taxonomic unit 5 classified as <i>Bradyrhizobium</i>                                    |
| 18  | OTU6      | Operational taxonomic unit 6 classified as <i>Ralstonia</i> sp                                      |
| 19  | OTU7      | Operational taxonomic unit 7 classified as <i>Pseudoalteromonas</i>                                 |

124

## 125 **Outlier detection**

126 To obtain approximate normality of the relative abundances of OTUs we transformed the OTU  
127 data using the natural logarithm (Ln). Influence statistic was used for outlier detection by  
128 regressing Ln (OTU) on all the phenotypes (Table 1) using PROC REG in SAS®. The cutoff value

129 for outliers was calculated as  $3p/n$  ( $> 0.10$ ), where  $n$  is the number of samples (i.e. animals) used  
130 to fit the model ( $n = 188$ ), and  $p$  is the number of parameters in the model. A total of 16 outliers  
131 were detected and deleted.

132

### 133 **Estimation of heritability**

134 To estimate heritabilities of the microbiota at the level of each OTU we first did a single-trait  
135 analysis of variance of the Ln (OTUs). In each analysis, the model was:

$$136 \quad [\mathbf{y}] = [\mathbf{X}][\mathbf{b}] + [\mathbf{Z}_a][\mathbf{a}] + [\mathbf{Z}_t][\mathbf{t}] + [\mathbf{e}], \quad [1]$$

137 where  $[\mathbf{y}]$  is a vector of individual OUT ‘phenotypes’ (i.e. the trait),  $[\mathbf{b}]$  is a vector of fixed effects,  
138 including sampling *day*<sub>*i*</sub> ( $i = 1-4$ ),  $[\mathbf{a}] \sim N(0, \mathbf{G}\sigma_a^2)$  is a vector of random additive genetic effects  
139 for the trait,  $[\mathbf{t}] \sim N(0, \mathbf{I}\sigma_t^2)$  is a vector of random tank effects for the trait, and  $[\mathbf{e}] \sim N(0, \mathbf{I}\sigma_e^2)$ , is a  
140 vector of random residuals for the trait. The  $\mathbf{X}$  and  $\mathbf{Z}$  matrices are corresponding incidence  
141 matrices,  $\mathbf{G}\sigma_a^2$  is the genomic (co)variance matrix,  $\mathbf{I}\sigma_t^2$  is the (co)variance matrix due to tank  
142 effects, and  $\mathbf{I}\sigma_e^2$  denotes the error (co)variance matrix. The number of phenotyped individuals was  
143 rather low ( $n = 172$ ), and the genomic relationship matrix was generated according to VanRaden’s  
144 first method (12). The matrix  $\mathbf{G}$  (2282x2282) was calculated based on a subset of 51,543 SNPs of  
145 high genotype quality, covering all autosomal chromosomes (AquaGen’s custom Axiom®SNP  
146 genotyping array from Thermo Fisher Scientific (San Diego, CA, USA) includes 56,177 single-  
147 nucleotide polymorphisms).

148

149 Heritabilities of the OTUs were estimated as:  $h^2 = \frac{\sigma_a^2}{\sigma_a^2 + \sigma_t^2 + \sigma_e^2}$ , where  $\sigma_a^2$ ,  $\sigma_t^2$ , and  $\sigma_e^2$  are the  
150 estimates of the individual additive genetic, tank environmental, and individual residual variance,



151 respectively, of the trait. The fraction of variance explained by the tank was estimated as:  $c^2 =$   
152  $\frac{\sigma_t^2}{\sigma_a^2 + \sigma_t^2 + \sigma_e^2}$ . Significance of the genetic effect was tested using a likelihood-ratio ( $LR$ ) test-statistic,  
153 comparing a single-trait model with genetic effects ( $H_1$ ) to a model without genetic effects ( $H_0$ ):

$$154 \quad LR = 2 \left( (\log L | \hat{\theta}_{H_1}) - (\log L | \hat{\theta}_{H_0}) \right).$$

155 The genetic effect was considered significant if  $LR > \chi^2_{(\alpha=0.05; df=1)}$ .

156

### 157 **Genome-wide association analysis**

158 To associate variation in microbial composition with host genetics a genome-wide association  
159 study was done using Ln (OTUs) as response variables. The analysis was carried out by a linear  
160 mixed-model algorithm implemented in a genome-wide complex trait analysis (GCTA)<sup>12</sup>. The  
161 leave one chromosome out option (*--mlm-loco*) was used, meaning that the chromosome harboring  
162 the SNP tested for was left out when building the genetic relationship matrix (GRM). The linear  
163 mixed model can be written:

$$164 \quad Y_i = a + bx + g_i^- + \varepsilon_i, \quad [2]$$

165 where  $Y_i$  is one of the Ln (OTUs) of individual  $i$ ,  $a$  is the intercept,  $b$  is the fixed regression of the  
166 candidate SNP to be tested for association,  $x$  is the SNP genotype indicator variable coded as 0, 1  
167 or 2,  $g_i^-$  is the random polygenic effect for individual  $i \sim N(0, \mathbf{G}\sigma_g^2)$  where  $\mathbf{G}$  is the GRM and  $\sigma_g^2$   
168 is the variance component for the polygenic effect, and  $\varepsilon_i$  is the random residual. In this algorithm,  
169  $\sigma_g^2$  is re-estimated each time a chromosome is left out from the calculation of the GRM. The dataset  
170 was filtered, and individuals with  $< 10\%$  missing genotypes were kept ( $n = 2279$ ). Further, it was  
171 required that SNPs should have minor allele frequency (MAF)  $\geq 1\%$  and a call rate  $> 90\%$ . After

172 filtering 54,200 SNPs could be included in the analysis. The level of significance for SNP was  
173 evaluated with a built-in likelihood-ratio test, and the threshold value for genome-wide  
174 significance was calculated by the use of Bonferroni correction  $(0.05/54200) = 9.23 \times 10^{-7}$ ,  
175 corresponding to a  $-\log_{10} p$ -value ( $p$ ) of 6.03.

176

### 177 **Association between OTUs and fish phenotypes**

178 We examined the association between microbiota and several individual fish phenotypes related  
179 to the metabolism of the fish, including growth, nutrient turnover, and feed efficiency parameters  
180 (Table 1). This phenotypic association were tested with a linear mixed-effect model:

$$181 \quad [\mathbf{y}] = [\mathbf{X}][\mathbf{b}] + [\mathbf{Z}_a][\mathbf{a}] + [\mathbf{Z}_t][\mathbf{t}] + [\mathbf{e}], \quad [3]$$

182 where,  $[\mathbf{b}]$  is a vector of fixed effects for the trait containing the regressions of sampling day (Day)  
183 and the Ln (OTUs), while the remaining are described with  $[\mathbf{1}]$ . In preceding analyses, we  
184 experienced a strong co-linearity between the tank and the family effects, which in consequence  
185 led us to analyze for the phenotypic association between production variables and the OTUs with  
186 a model accounting for the genomic relationships between individuals (also known as a genomic  
187 selection model).

188 The genetic analyses in  $[\mathbf{1}]$  and  $[\mathbf{3}]$  were carried out using the ASReml4 software package (14).

189

## 190 **Results**

### 191 **Overall microbiota composition**

192 We obtained a total of 9 991 266 read counts after filtering and paired-end sequence merging. The  
193 mean read count per sample was 22 007. A total of 704 OTUs were defined, with the dead bacterial

194 fraction representing 9.1% of the sequencing reads (contained in 254 OTUs). In addition, a fraction  
 195 of 0.003% of the sequencing reads (contained in 146 OTUs) were considered as contaminations  
 196 (Fig. 2A). Among the 304 OTUs passing the live/dead/contamination filtering we identified a clear  
 197 over-representation of *Proteobacteria*, both with respect to OTU prevalence and quantity (Fig.  
 198 2B). OTU1 *Caulobacteraceae* and OTU2 *Pseudomonas fluorescens* dominated, with mean  
 199 abundances of 32.9% and 34.8%, respectively. There were 6 OTUs with a mean abundance > 1 %  
 200 in all the samples. We detected an overall negative correlation between OTU1 *Caulobacteraceae*  
 201 to the other OTUs (Fig. 2C). Bacterial DNA was detected in one out of five negative control, with  
 202 a dominance of *Halomonas* (43.4%) and *Pseudoalteromonas* (40.6 %), followed by *Bacillus* (4.2  
 203 %) and *Pseudomonas fluorescens* (4.1%).

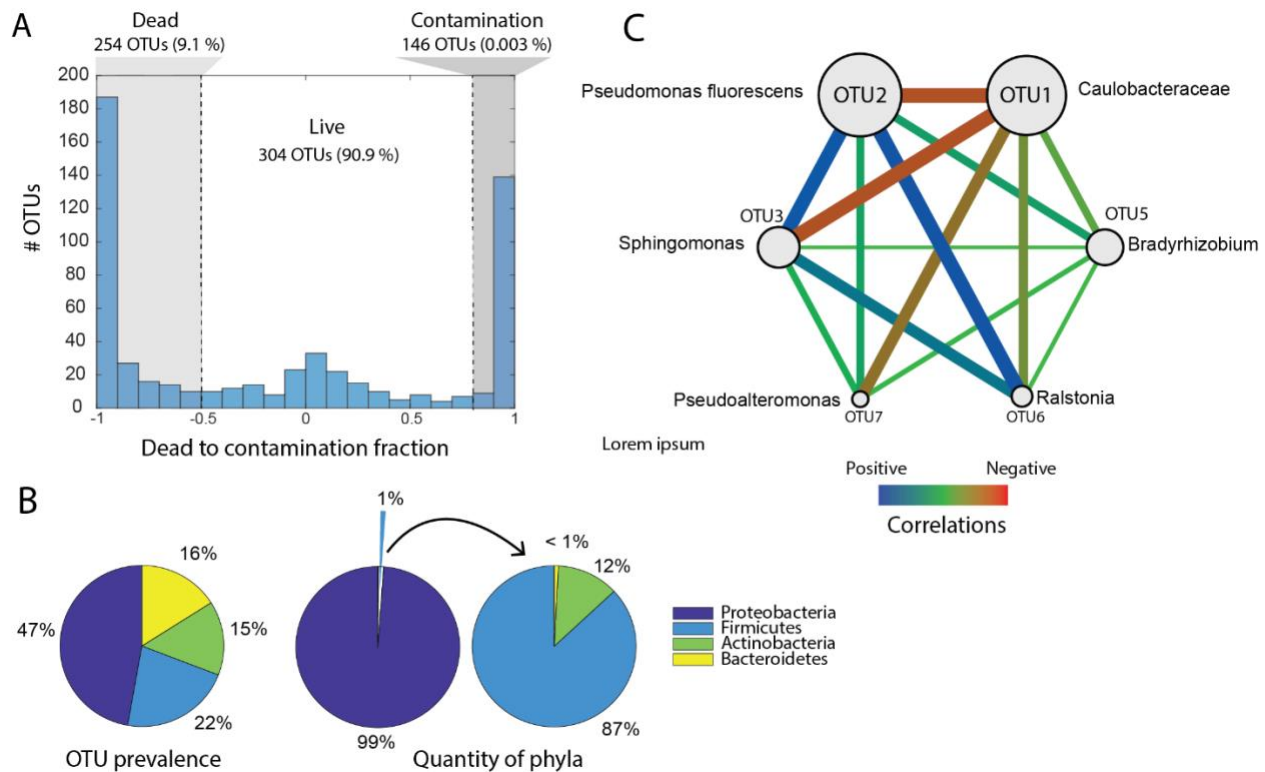

204

205 **Figure 2. General characteristics of gut microbiota.** (A) Fractions of dead, live, and contamination OTUs. Fractions  
 206 calculated based on the ratio of OTU counts in PMA treated samples versus untreated samples. (B) Prevalence  
 207 (number of OTUs) and quantity (number of sequencing reads) for the different phyla in the most abundant OTUs. (C)

208 Spearman correlations between the dominant live bacteria (high-abundant OTUs). The high abundant OTUs were  
209 identified as those that have an abundance of > 1% on average in all the samples.

210

## 211 **Effects of rearing tank and host genetics on the gut microbiome composition**

212 To assess the contribution of genetics (i.e. heritability) and environment (i.e. tanks effect) in  
213 driving the variation in microbial composition between individual fish we applied analyses of  
214 variance, using tank as a covariate. Although we classified 304 OTUs across all gut microbiomes,  
215 the top 6 most abundant OTUs represented 85% of the 16S sequences in our dataset. We, therefore,  
216 conducted these analyses using only these OTUs. The results (Table 2) showed small genetic  
217 components for OTUs 1 and 3 and only a small non-significant tank effect for OTU1 (0.03).  
218 However, neither the tank nor genetic effects were significantly different from zero ( $p > 0.05$ ).  
219 However, the standard errors were large, meaning that the experiment did not have the power to  
220 estimate these components precisely. This is supported by the estimates of variance components  
221 for genetic or tank effects (or both) of the remaining OTUs being zero (i.e. restricted to the  
222 boundary of the parameter space) (Table 2).

223

224 **Table 2.** Estimates of the genetic, tank and residual variance components ( $\sigma_a^2$  and  $\sigma_t^2$ , respectively), the fraction  
225 of phenotypic variance explained by the environmental tank effect ( $c^2$ ), heritability ( $h^2$ ), as well as the  $\chi^2$   
226 statistics for the additive genetic family effect, with the corresponding level of significance ( $p$ ).

|      | $\sigma_a^2$      | $\sigma_t^2$      | $\sigma_e^2$ | $c^2$           | $h^2$           | $\chi^2$ | $p$  |
|------|-------------------|-------------------|--------------|-----------------|-----------------|----------|------|
| OTU1 | 0.007             | 0.009             | 0.25         | $0.03 \pm 0.08$ | $0.03 \pm 0.09$ | 0.13     | 0.72 |
| OTU2 | 0.00 <sub>1</sub> | 0.00 <sub>1</sub> | 0.14         | 0               | 0               | 0        | 1    |
| OTU3 | 0.007             | 0.00 <sub>1</sub> | 0.58         | 0               | $0.10 \pm 0.09$ | 1.72     | 0.19 |
| OTU5 | 0.00 <sub>1</sub> | 0.00 <sub>1</sub> | 0.13         | 0               | 0               | 0        | 1    |
| OTU6 | 0.00 <sub>1</sub> | 0.00 <sub>1</sub> | 0.07         | 0               | 0               | 0        | 1    |
| OTU7 | 0.00 <sub>1</sub> | 0.00 <sub>1</sub> | 0.18         | 0               | 0               | 0        | 1    |

227 1Restricted on the boundary of parameter space

228

229 Finally, we utilize the existing genotyping data for these fish(6) to perform a genome-wide  
 230 association analyses for the OTU abundances. No genome-significant associations between SNPs  
 231 and OTUs were identified, however, the Manhattan plots show clear peaks at chromosomes 14,  
 232 24, 3, and 5 (Suppl. Fig. 1), with some SNPs having significant associations to OTU1 and OTU2  
 233 at the chromosome level (Suppl. Fig. 2, Suppl. Table 1).

234

### 235 **Community structure is associated with fish growth and metabolism**

236 Linear regressions were used to examine the phenotypic relationship between the gut microbiome  
 237 and host metabolism traits (i.e. growth, nutrient turnover, and feed efficiency, see table 1). Indeed,  
 238 these analyses (Table 3) do indicate a link between the production variables and the gut  
 239 microbiome (significant associations in Table 3, for all results see Suppl. Table 2).

240

241 **Table 3.** Regression estimates, standard errors, *F*- and *p*-values when regressing OTUs on growth,  
 242 metabolism, and feed efficiency variables. The model also contained regression on day and random effects  
 243 of animal (utilizing genomic relationships) and tank, for which variance components are included.

244

| <b>Dependent variable</b> | <b>Variables</b> | <b>Estimate</b> | <b>Stderr</b> | <b>F-value</b> | <b><i>p</i>-value</b> | <b>Variance component</b> |
|---------------------------|------------------|-----------------|---------------|----------------|-----------------------|---------------------------|
| WG                        | Day              | 3.338           | 0.177         | 355.73         | <0.005                |                           |
|                           | OTU1             | -0.324          | 0.376         | 0.15           | NS                    |                           |
|                           | OTU2             | 2.191           | 1.199         | 0.04           | NS                    |                           |
|                           | OTU3             | -1.352          | 0.624         | 4.66           | <0.05                 |                           |
|                           | OTU5             | -0.743          | 0.535         | 1.78           | NS                    |                           |
|                           | OTU6             | -0.440          | 0.866         | 0.26           | NS                    |                           |
|                           | OTU7             | 0.179           | 0.492         | 0.30           | NS                    |                           |
|                           | Tank             |                 |               |                |                       |                           |
|                           | Animal           |                 |               |                |                       | 5.54 ± 0.69               |
| AAC                       | Day              | 0.082           | 0.019         | 17.95          | <0.005                |                           |
|                           | OTU1             | 0.007           | 0.003         | 1.39           | NS                    |                           |
|                           | OTU2             | -0.016          | 0.009         | 2.15           | NS                    |                           |
|                           | OTU3             | -0.001          | 0.005         | 1.31           | NS                    |                           |
|                           | OTU5             | 0.006           | 0.004         | 4.63           | <0.05                 |                           |
|                           | OTU6             | -0.001          | 0.007         | 0.01           | NS                    |                           |
|                           | OTU7             | 0.010           | 0.004         | 8.53           | <0.005                |                           |
|                           | Tank             |                 |               |                |                       |                           |

|          | Animal |        |       |        |        | $0.87 \times 10^{-4} \pm 2.21 \times 10^{-4}$ |
|----------|--------|--------|-------|--------|--------|-----------------------------------------------|
| IFER_AMC | Day    | 0.365  | 0.021 | 297.49 | <0.005 |                                               |
|          | OTU1   | 0.043  | 0.026 | 5.55   | <0.03  |                                               |
|          | OTU2   | -0.101 | 0.083 | 0.41   | NS     |                                               |
|          | OTU3   | 0.018  | 0.043 | 1.34   | NS     |                                               |
|          | OTU5   | -0.023 | 0.037 | 0.03   | NS     |                                               |
|          | OTU6   | 0.035  | 0.060 | 0.34   | NS     |                                               |
|          | OTU7   | 0.081  | 0.034 | 5.22   | <0.03  |                                               |
|          | Tank   |        |       |        |        | $0.20 \pm 0.04$                               |
|          | Animal |        |       |        |        | $0.43 \times 10^{-2} \pm 1.51 \times 10^{-3}$ |
| IFER_AMN | Day    | 0.149  | 0.009 | 273.21 | <0.005 |                                               |
|          | OTU1   | 0.020  | 0.009 | 3.89   | <0.05  |                                               |
|          | OTU2   | -0.026 | 0.027 | 2.86   | NS     |                                               |
|          | OTU3   | 0.001  | 0.014 | 0.64   | NS     |                                               |
|          | OTU5   | -0.016 | 0.012 | 0.79   | NS     |                                               |
|          | OTU6   | 0.008  | 0.020 | 0.16   | NS     |                                               |
|          | OTU7   | 0.027  | 0.011 | 5.83   | <0.03  |                                               |
|          | Tank   |        |       |        |        | $0.04 \pm 7.86 \times 10^{-3}$                |
|          | Animal |        |       |        |        | $0.29 \times 10^{-3} \pm 1.51 \times 10^{-4}$ |

245

246 OTU3 (*Sphingomonas*) regressed negatively on weight gain ( $p < 0.05$ ), OTU1  
 247 (*Caulobacteriaceae*) and OTU7 (*Pseudoalteromonas*) regressed positively on feed efficiency  
 248 indicators ( $p < 0.05$ ), while OTU7 ( $p < 0.005$ ) and OTU5 (*Bradyrhizobium*) ( $p < 0.05$ ) regressed  
 249 positively on carbon metabolism in adipose tissue (AAC variable).

250

## 251 Discussion

252 A major strength of this experiment is that each individual fish microbiome can be linked to  
 253 detailed individual-level phenotypes of growth, feed efficiency, and nutrient turnover as measured  
 254 by the use of stable-isotope profiling in the liver, muscle, and adipose tissues (6). Intriguingly, the  
 255 phenotypic associations between OTUs and fish production-related phenotypes revealed several  
 256 significant relationships (Table 3). We observed significant positive associations between lipid  
 257 carbon metabolism (the AAC phenotype) and OTU5 ( $p < 0.05$ ) and OTU7 ( $p < 0.005$ ). These  
 258 OTUs belong to the genera *Bradyrhizobium*, and *Pseudoalteromonas*, respectively.

259 *Pseudoalteromonas* is known to have the capacity to produce a range of biologically active  
260 extracellular compounds, ranging from antimicrobial compounds and proteases to compounds  
261 important for host metamorphosis (15). This genus has also been used as probiotics in fish farming  
262 (16). *Bradyrhizobium*, on the other hand, is a widespread environmental bacterium capable of  
263 degrading aromatic compounds and nitrogen fixation (17). However, the potential mechanisms for  
264 the bacterial associations with lipid metabolism in salmon are completely unknown. The  
265 *Sphingomonas* OTU3 showed a significant negative association with weight gain. This genus has  
266 previously been associated with antibiotic resistance connected to disease treatment of juvenile  
267 salmon in fresh-water (18) , which may indicate that reduced weight gain could be connected to  
268 the opportunistic properties of *Sphingomonas* (19). Lastly, OTU1 belonging to *Caulobacteriaceae*  
269 showed a strong negative correlation with the other OTU (Fig. 2C), and a significant positive  
270 association with two of the feed utilization efficiency metrics (Table 3), which also had a positive  
271 association to OTU7. One interpretation of this is that *Caulobacteriaceae* has a mutualistic  
272 association with juvenile salmon, possibly by protecting juvenile salmon against opportunistic  
273 infections.

274

275 The association between OTUs and the lipid carbon metabolism (AAC) in Atlantic salmon means  
276 that fish with higher abundances of these microbes also convert the feed protein fraction to lipids  
277 at a higher rate. However, the mechanisms driving this association remains elusive. One possibility  
278 is that the Atlantic salmon gut microbiota has a direct impact on the production of biomolecules  
279 in the distal intestine which are readily absorbed and deposited as fat in adipose tissues. It is worth  
280 noting that Dvergedal et al. (6) have reported that fish with a higher turnover of carbon in lipid  
281 tissues also have improved feed efficiency (see IFER variable in Tables 1 and 3) and fast growth.

282 In other words, the fish with high carbon turnover in lipid tissues will likely have a positive energy  
283 balance and therefore also the opportunity to convert more surplus energy into lipids for storage.  
284 We did however not observe associations between gut microbes and nutrient turnover in muscle  
285 or liver. This lack of association with nitrogen turnover could be because the majority of the protein  
286 fraction is digested and absorbed before the distal intestine where our microbial samples were  
287 collected from. It is also possible that the associations between microbial composition and fish  
288 metabolism are driven by indirect factors. Since growth is positively correlated with feed intake  
289 (6), these fish might also have increased passage rate in the gastrointestinal tract due to high feed  
290 intake. This could indirectly affect the competition and balance among microbes and thereby shift  
291 the community structure. It is thus critical that future studies include functional meta-omics data  
292 that can also demonstrate shifts in activities in microbial metabolic pathways.

293

294 Host genetic effects on gut microbiomes have been identified in recent studies in a wide range of  
295 animals, including invertebrates (20), mammals (21,22), and fish (23). Here we associate OTUs  
296 and metabolic fish phenotypes using a regression, correcting for the effects of additive genotype  
297 and tank, aiming to eliminate possible confounding effects. Using this approach, we only found  
298 weak (and non-significant) associations between host genetics and relative OTU abundance (Table  
299 2, Supplementary Fig. 1 and 2). Neither did we find rearing tank effects, in correspondence with a  
300 study in tilapia (24). However, it is clear from the standard errors (Table 2) that our OTU  
301 heritability estimates were very imprecise. Hence, to assess the importance of host genetics on gut  
302 microbiome composition in Atlantic salmon, future studies must increase sample size significantly  
303 and apply ‘common rearing’ experimental designs to avoid confounding tank and family effects.  
304 The PMA screening indicates that more than half of the OTUs detected in the salmon gut could



305 come from feed or dead bacteria. The PMA assay, however, does not cover contaminants in  
306 reagents. The negative controls revealed detectable contamination in only one sample, with none  
307 of the common reagent contaminants being detected at levels > 1 % (25,26). The most likely source  
308 of contamination in that sample would therefore be spillover, and not reagent contaminants.

309

## 310 **Conclusion**

311 In conclusion, our results demonstrate an association between the microbial composition in the  
312 distal gut and a key aspect of Atlantic salmon metabolism. This association could be a direct effect  
313 of microbes contributing to improved nutrient availability and absorption for the host.  
314 Alternatively, these associations could be uncoupled from the microbiota function and instead  
315 driven by feeding behavior and passage rates. Future experiments should, therefore, aim to  
316 measure changes in microbial metabolic pathways to separate causal from correlative microbe-  
317 host associations.

318

## 319 **Funding**

320 This study was supported by The Norwegian University of Life Sciences, AquaGen AS and Foods  
321 of Norway, a Centre for Research-based Innovation (the Research Council of Norway; grant no.  
322 237841/O30), GenoSysFat (the Research Council of Norway Havbruk; grant no. 244164/E40),  
323 and DigiSal (the Research Council of Norway grant no. 248792).

324

## 325 **Acknowledgments**

326 We thank Margareth Øverland, Liv Torunn Mydland and Jørgen Ødegård for the planning of the  
327 experiment and Jørgen Ødegård for creating the genomic relationship matrices used in this study.  
328

329 **SUPPLEMENTARY TABLES**

330

331 **Suppl. Table 1.** Single-nucleotide polymorphisms (SNP) associated with the OTU variables.

| Trait       | Chr         | SNP                        | bp                         | A1       | A2 | Freq | b     | se   | p        | log10(p)    |
|-------------|-------------|----------------------------|----------------------------|----------|----|------|-------|------|----------|-------------|
| <b>OTU1</b> | 5           | ctg7180001925291_748_SCT   | 27518103                   | C        | T  | 0.10 | -0.51 | 0.12 | 2.49E-05 | -4.6        |
|             | 5           | ctg7180001311517_3981_SAG  | 29290387                   | G        | A  | 0.10 | -0.46 | 0.11 | 2.51E-05 | -4.6        |
|             | 5           | ctg7180001833723_2640_SAG  | 56739234                   | A        | G  | 0.01 | -1.44 | 0.28 | 4.53E-07 | -6.3        |
|             | 14          | ctg7180001903206_2590_SCT  | 5592915                    | C        | T  | 0.15 | -0.45 | 0.10 | 1.81E-06 | -5.7        |
|             | 19          | ctg7180001841090_969_SAG   | 42066887                   | G        | A  | 0.02 | -1.03 | 0.23 | 8.21E-06 | -5.1        |
|             | 19          | ctg7180001800309_4785_SCT  | 67320228                   | C        | T  | 0.09 | -0.55 | 0.13 | 1.70E-05 | -4.8        |
|             | 19          | ctg7180001645427_1176_SAG  | 75579801                   | A        | G  | 0.02 | -1.16 | 0.27 | 1.57E-05 | -4.8        |
| <b>OTU2</b> | 1           | ctg7180001908955_3685_SAG  | 4697317                    | G        | A  | 0.06 | -0.46 | 0.11 | 2.11E-05 | -4.7        |
|             | 5           | ctg7180001722113_3376_SGT  | 25219965                   | G        | T  | 0.01 | -1.05 | 0.21 | 7.26E-07 | -6.1        |
|             | 5           | ctg7180001672687_10612_SAG | 28647949                   | A        | G  | 0.01 | -1.05 | 0.21 | 7.26E-07 | -6.1        |
|             | 6           | ctg7180001847439_3403_SAC  | 32454164                   | A        | C  | 0.03 | -0.59 | 0.14 | 2.32E-05 | -4.6        |
|             | 6           | ctg7180001828921_349_SAG   | 64415855                   | G        | A  | 0.01 | -0.96 | 0.20 | 1.30E-06 | -5.9        |
|             | 11          | ctg7180001900871_1769_SCT  | 85379984                   | T        | C  | 0.08 | -0.39 | 0.09 | 1.13E-05 | -4.9        |
|             | 12          | ctg7180001666651_1965_SAC  | 12523402                   | A        | C  | 0.03 | -0.70 | 0.16 | 1.56E-05 | -4.8        |
|             | 12          | ctg7180001840586_4279_SCT  | 43076320                   | C        | T  | 0.07 | -0.47 | 0.10 | 1.92E-06 | -5.7        |
|             | 12          | ctg7180001839373_5142_SAC  | 54225053                   | C        | A  | 0.01 | -1.14 | 0.21 | 8.12E-08 | -7.1        |
|             | 12          | ctg7180001484203_1236_SAC  | 68394895                   | C        | A  | 0.02 | -1.09 | 0.20 | 9.88E-08 | -7.0        |
|             | 15          | ctg7180001298386_4207_SGT  | 20950022                   | T        | G  | 0.02 | -0.95 | 0.21 | 3.77E-06 | -5.4        |
|             | 15          | ctg7180001878210_7094_SAG  | 36237432                   | A        | G  | 0.02 | -0.78 | 0.18 | 1.97E-05 | -4.7        |
|             | 22          | ctg7180001807745_17982_SAC | 34245759                   | C        | A  | 0.02 | -1.08 | 0.21 | 1.40E-07 | -6.9        |
|             | 24          | ctg7180001301776_10058_SAG | 26185685                   | A        | G  | 0.10 | -0.39 | 0.09 | 8.01E-06 | -5.1        |
|             | 29          | ctg7180001835668_5175_SAC  | 35464325                   | A        | C  | 0.04 | -0.76 | 0.13 | 6.34E-09 | -8.2        |
|             | 29          | ctg7180001540342_979_SAC   | 37759078                   | C        | A  | 0.13 | -0.32 | 0.07 | 1.51E-05 | -4.8        |
|             | <b>OTU5</b> | 7                          | ctg7180001798708_11367_SCT | 14075405 | C  | T    | 0.51  | 0.27 | 0.06     | 2.56E-05    |
| 7           |             | ctg7180001798708_5931_SAG  | 14080841                   | G        | A  | 0.40 | -0.28 | 0.07 | 3.62E-05 | -4.4        |
| 15          |             | ctg7180001298386_4207_SGT  | 20950022                   | T        | G  | 0.02 | -1.15 | 0.26 | 1.41E-05 | -4.9        |
| <b>OTU6</b> | 3           | ctg7180001338507_1900_SCT  | 12338431                   | C        | T  | 0.36 | 0.17  | 0.04 | 1.47E-05 | -4.8        |
|             | 3           | ctg7180001916975_10480_SGT | 26091556                   | T        | G  | 0.43 | 0.18  | 0.04 | 8.24E-06 | -5.1        |
| <b>OTU7</b> | 5           | ctg7180001841488_1545_SCT  | 8907693                    | C        | T  | 0.15 | 0.38  | 0.08 | 5.82E-06 | <b>-5.2</b> |

332

333

334

335

336

337

338

339

340 **Suppl. Table 2.** Regression estimates, standard errors, *F*- and *p*-values when regressing OTUs on growth, metabolism, and  
 341 feed efficiency variables. The model also contained regression on day and random effects of animal (utilizing genomic  
 342 relationships), and tank for which variance components are included.

| Dependent variable | Variables | Estimate | Stderr | F-value | <i>p</i> -value | Variance component                            |
|--------------------|-----------|----------|--------|---------|-----------------|-----------------------------------------------|
| WG                 | Day       | 3.338    | 0.177  | 355.73  | <0.005          |                                               |
|                    | OTU1      | -0.324   | 0.376  | 0.15    | NS              |                                               |
|                    | OTU2      | 2.191    | 1.199  | 0.04    | NS              |                                               |
|                    | OTU3      | -1.352   | 0.624  | 4.66    | <0.05           |                                               |
|                    | OTU5      | -0.743   | 0.535  | 1.78    | NS              |                                               |
|                    | OTU6      | -0.440   | 0.866  | 0.26    | NS              |                                               |
|                    | OTU7      | 0.179    | 0.492  | 0.30    | NS              |                                               |
|                    | Tank      |          |        |         |                 | 13.84 ± 3.25                                  |
|                    | Animal    |          |        |         |                 | 5.54 ± 0.69                                   |
| RG                 | Day       | 9.969    | 0.522  | 365.90  | <0.005          |                                               |
|                    | OTU1      | 0.983    | 0.854  | 3.64    | NS              |                                               |
|                    | OTU2      | -3.500   | 2.715  | 0.01    | NS              |                                               |
|                    | OTU3      | 1.118    | 1.410  | 2.04    | NS              |                                               |
|                    | OTU5      | -0.149   | 1.214  | 0.06    | NS              |                                               |
|                    | OTU6      | 1.094    | 1.963  | 0.31    | NS              |                                               |
|                    | OTU7      | 2.121    | 1.117  | 3.29    | NS              |                                               |
|                    | Tank      |          |        |         |                 | 122.00 ± 26.75                                |
|                    | Animal    |          |        |         |                 | 14.56 ± 2.56                                  |
| AMC                | Day       | 0.270    | 0.027  | 101.92  | <0.005          |                                               |
|                    | OTU1      | 0.004    | 0.006  | 0.01    | NS              |                                               |
|                    | OTU2      | -0.020   | 0.020  | 0.00    | NS              |                                               |
|                    | OTU3      | 0.006    | 0.010  | 0.42    | NS              |                                               |
|                    | OTU5      | 0.001    | 0.009  | 0.08    | NS              |                                               |
|                    | OTU6      | 0.010    | 0.014  | 0.49    | NS              |                                               |
|                    | OTU7      | 0.007    | 0.008  | 0.55    | NS              |                                               |
|                    | Tank      |          |        |         |                 | 0.48 ± 0.11                                   |
|                    | Animal    |          |        |         |                 | 0.41x10 <sup>-3</sup> ± 1.03x10 <sup>-4</sup> |
| AMN                | Day       | 0.288    | 0.019  | 230.96  | <0.005          |                                               |
|                    | OTU1      | 0.002    | 0.014  | 0.66    | NS              |                                               |
|                    | OTU2      | -0.048   | 0.045  | 0.59    | NS              |                                               |
|                    | OTU3      | 0.018    | 0.023  | 0.99    | NS              |                                               |
|                    | OTU5      | 0.015    | 0.020  | 0.85    | NS              |                                               |
|                    | OTU6      | 0.020    | 0.032  | 0.37    | NS              |                                               |
|                    | OTU7      | 0.017    | 0.018  | 0.57    | NS              |                                               |
|                    | Tank      |          |        |         |                 | 0.17 ± 0.04                                   |
|                    | Animal    |          |        |         |                 | 0.41x10 <sup>-2</sup> ± 7.08x10 <sup>-4</sup> |
| ALC                | Day       | 0.088    | 0.028  | 9.78    | <0.005          |                                               |
|                    | OTU1      | 0.004    | 0.004  | 0.29    | NS              |                                               |
|                    | OTU2      | -0.014   | 0.013  | 0.08    | NS              |                                               |
|                    | OTU3      | -0.004   | 0.007  | 0.34    | NS              |                                               |
|                    | OTU5      | 0.005    | 0.006  | 1.22    | NS              |                                               |
|                    | OTU6      | 0.009    | 0.010  | 0.89    | NS              |                                               |
|                    | OTU7      | 0.007    | 0.005  | 1.21    | NS              |                                               |
|                    | Tank      |          |        |         |                 | 1.83 ± 0.41                                   |
|                    | Animal    |          |        |         |                 | 0.18x10 <sup>-3</sup> ± 4.52x <sup>-4</sup>   |

343  
 344  
 345  
 346  
 347  
 348

349

350 *Suppl. Table 2. Continued*

351

| Dependent variable | Variables | Estimate | Stderr | F-value | p-value | Variance component                            |
|--------------------|-----------|----------|--------|---------|---------|-----------------------------------------------|
| ALN                | Day       | 0.445    | 0.032  | 191.05  | <0.005  |                                               |
|                    | OTU1      | 0.013    | 0.015  | 0.05    | NS      |                                               |
|                    | OTU2      | -0.061   | 0.047  | 0.00    | NS      |                                               |
|                    | OTU3      | 0.007    | 0.024  | 0.52    | NS      |                                               |
|                    | OTU5      | 0.012    | 0.021  | 0.88    | NS      |                                               |
|                    | OTU6      | 0.024    | 0.034  | 0.49    | NS      |                                               |
|                    | OTU7      | 0.034    | 0.019  | 2.58    | NS      |                                               |
|                    | Tank      |          |        |         |         | 0.51 ± 0.11                                   |
|                    | Animal    |          |        |         |         | 0.37x10 <sup>-2</sup> ± 7.42x10 <sup>-4</sup> |
| AAC                | Day       | 0.082    | 0.019  | 17.95   | <0.005  |                                               |
|                    | OTU1      | 0.007    | 0.003  | 1.39    | NS      |                                               |
|                    | OTU2      | -0.016   | 0.009  | 2.15    | NS      |                                               |
|                    | OTU3      | -0.001   | 0.005  | 1.31    | NS      |                                               |
|                    | OTU5      | 0.006    | 0.004  | 4.63    | <0.05   |                                               |
|                    | OTU6      | -0.001   | 0.007  | 0.01    | NS      |                                               |
|                    | OTU7      | 0.010    | 0.004  | 8.53    | <0.005  |                                               |
|                    | Tank      |          |        |         |         | 0.90 ± 0.20                                   |
|                    | Animal    |          |        |         |         | 0.87x10 <sup>-4</sup> ± 2.21x10 <sup>-4</sup> |
| IFCR_AMC           | Day       | 0.231    | 0.020  | 130.26  | <0.005  |                                               |
|                    | OTU1      | -0.024   | 0.023  | 2.34    | NS      |                                               |
|                    | OTU2      | 0.053    | 0.072  | 0.21    | NS      |                                               |
|                    | OTU3      | -0.020   | 0.037  | 1.32    | NS      |                                               |
|                    | OTU5      | 0.019    | 0.032  | 0.09    | NS      |                                               |
|                    | OTU6      | -0.009   | 0.052  | 0.03    | NS      |                                               |
|                    | OTU7      | -0.044   | 0.030  | 2.25    | NS      |                                               |
|                    | Tank      |          |        |         |         | 0.19 ± 0.04                                   |
|                    | Animal    |          |        |         |         | 0.24x10 <sup>-2</sup> ± 1.08x10 <sup>-3</sup> |
| IFCR_AMN           | Day       | 0.554    | 0.047  | 138.65  | <0.005  |                                               |
|                    | OTU1      | -0.086   | 0.049  | 1.71    | NS      |                                               |
|                    | OTU2      | 0.149    | 0.153  | 1.61    | NS      |                                               |
|                    | OTU3      | -0.049   | 0.079  | 1.18    | NS      |                                               |
|                    | OTU5      | 0.083    | 0.069  | 0.85    | NS      |                                               |
|                    | OTU6      | -0.057   | 0.111  | 0.26    | NS      |                                               |
|                    | OTU7      | -0.105   | 0.063  | 2.47    | NS      |                                               |
|                    | Tank      |          |        |         |         | 1.01 ± 0.21                                   |
|                    | Animal    |          |        |         |         | 0.64x10 <sup>-2</sup> ± 4.43x10 <sup>-3</sup> |
| IFER_AMC           | Day       | 0.365    | 0.021  | 297.49  | <0.005  |                                               |
|                    | OTU1      | 0.043    | 0.026  | 5.55    | <0.03   |                                               |
|                    | OTU2      | -0.101   | 0.083  | 0.41    | NS      |                                               |
|                    | OTU3      | 0.018    | 0.043  | 1.34    | NS      |                                               |
|                    | OTU5      | -0.023   | 0.037  | 0.03    | NS      |                                               |
|                    | OTU6      | 0.035    | 0.060  | 0.34    | NS      |                                               |
|                    | OTU7      | 0.081    | 0.034  | 5.22    | <0.03   |                                               |
|                    | Tank      |          |        |         |         | 0.20 ± 0.04                                   |
|                    | Animal    |          |        |         |         | 0.43x10 <sup>-2</sup> ± 1.51x10 <sup>-3</sup> |
| IFER_AMN           | Day       | 0.149    | 0.009  | 273.21  | <0.005  |                                               |
|                    | OTU1      | 0.020    | 0.009  | 3.89    | <0.05   |                                               |
|                    | OTU2      | -0.026   | 0.027  | 2.86    | NS      |                                               |
|                    | OTU3      | 0.001    | 0.014  | 0.64    | NS      |                                               |
|                    | OTU5      | -0.016   | 0.012  | 0.79    | NS      |                                               |
|                    | OTU6      | 0.008    | 0.020  | 0.16    | NS      |                                               |
|                    | OTU7      | 0.027    | 0.011  | 5.83    | <0.03   |                                               |
|                    | Tank      |          |        |         |         | 0.04 ± 7.86x10 <sup>-3</sup>                  |

352

353 **SUPPLEMENTARY FIGURES**

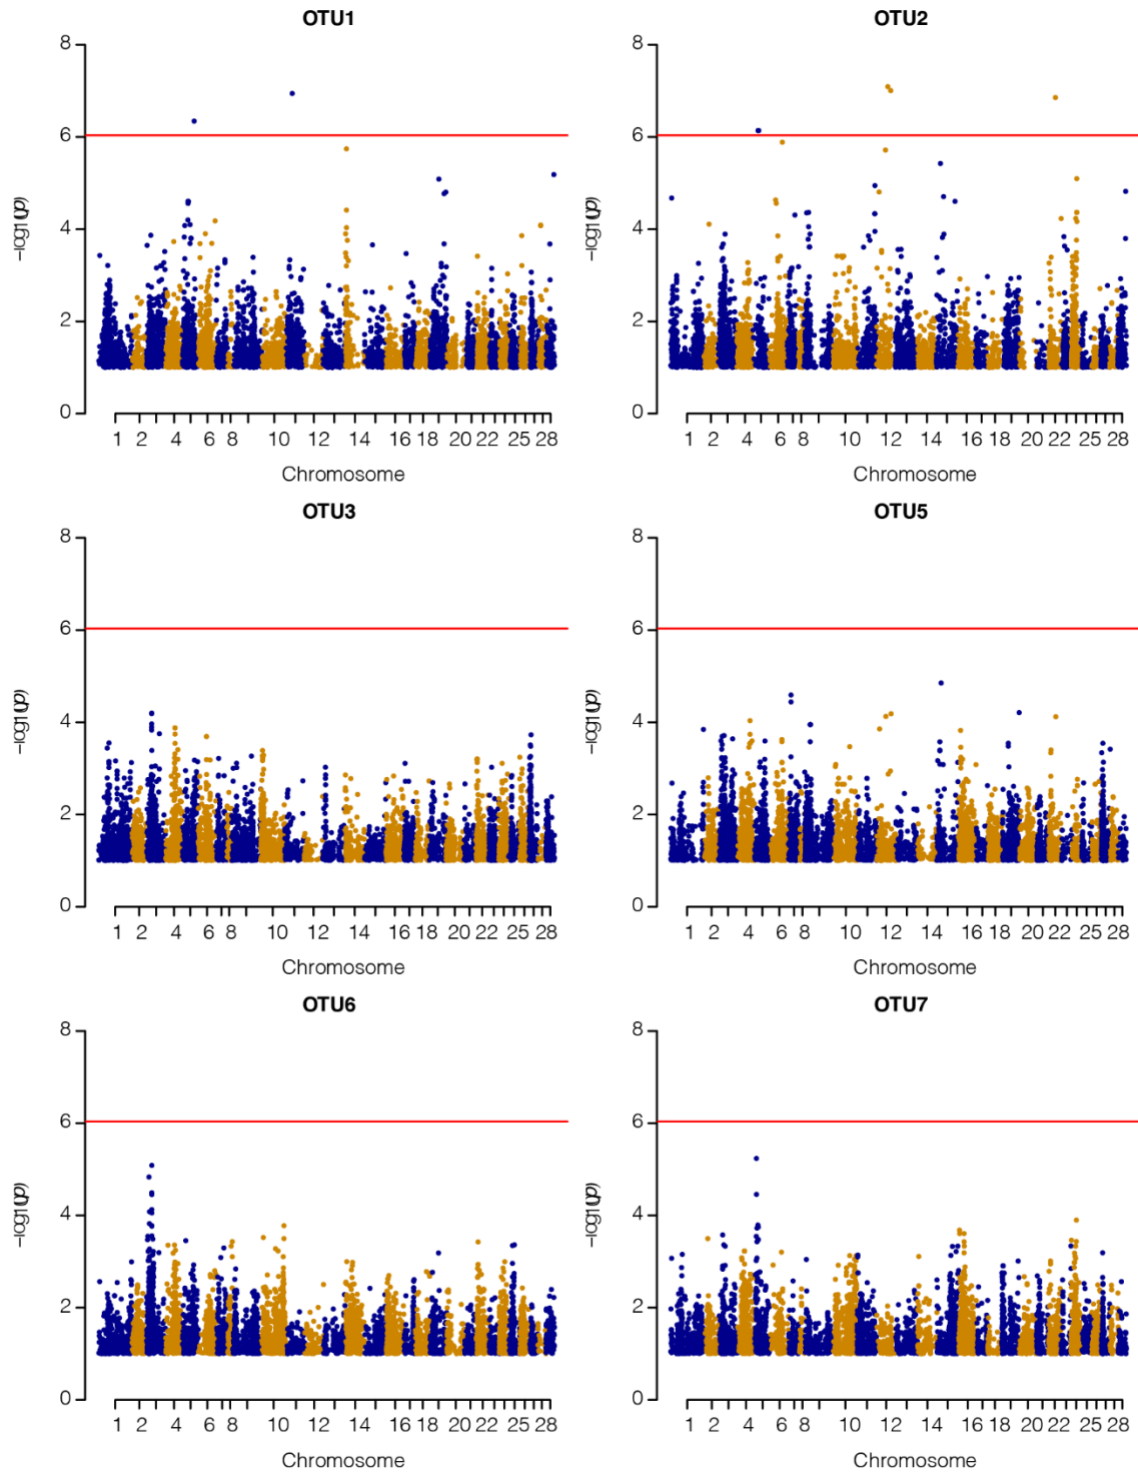

354

355 **Suppl. Fig. 1. Genome-wide Manhattan plot for the different OTUs. The horizontal line**  
356 **represents the genome-wide Bonferroni  $-\log_{10}(p) = 6.03$  threshold.**

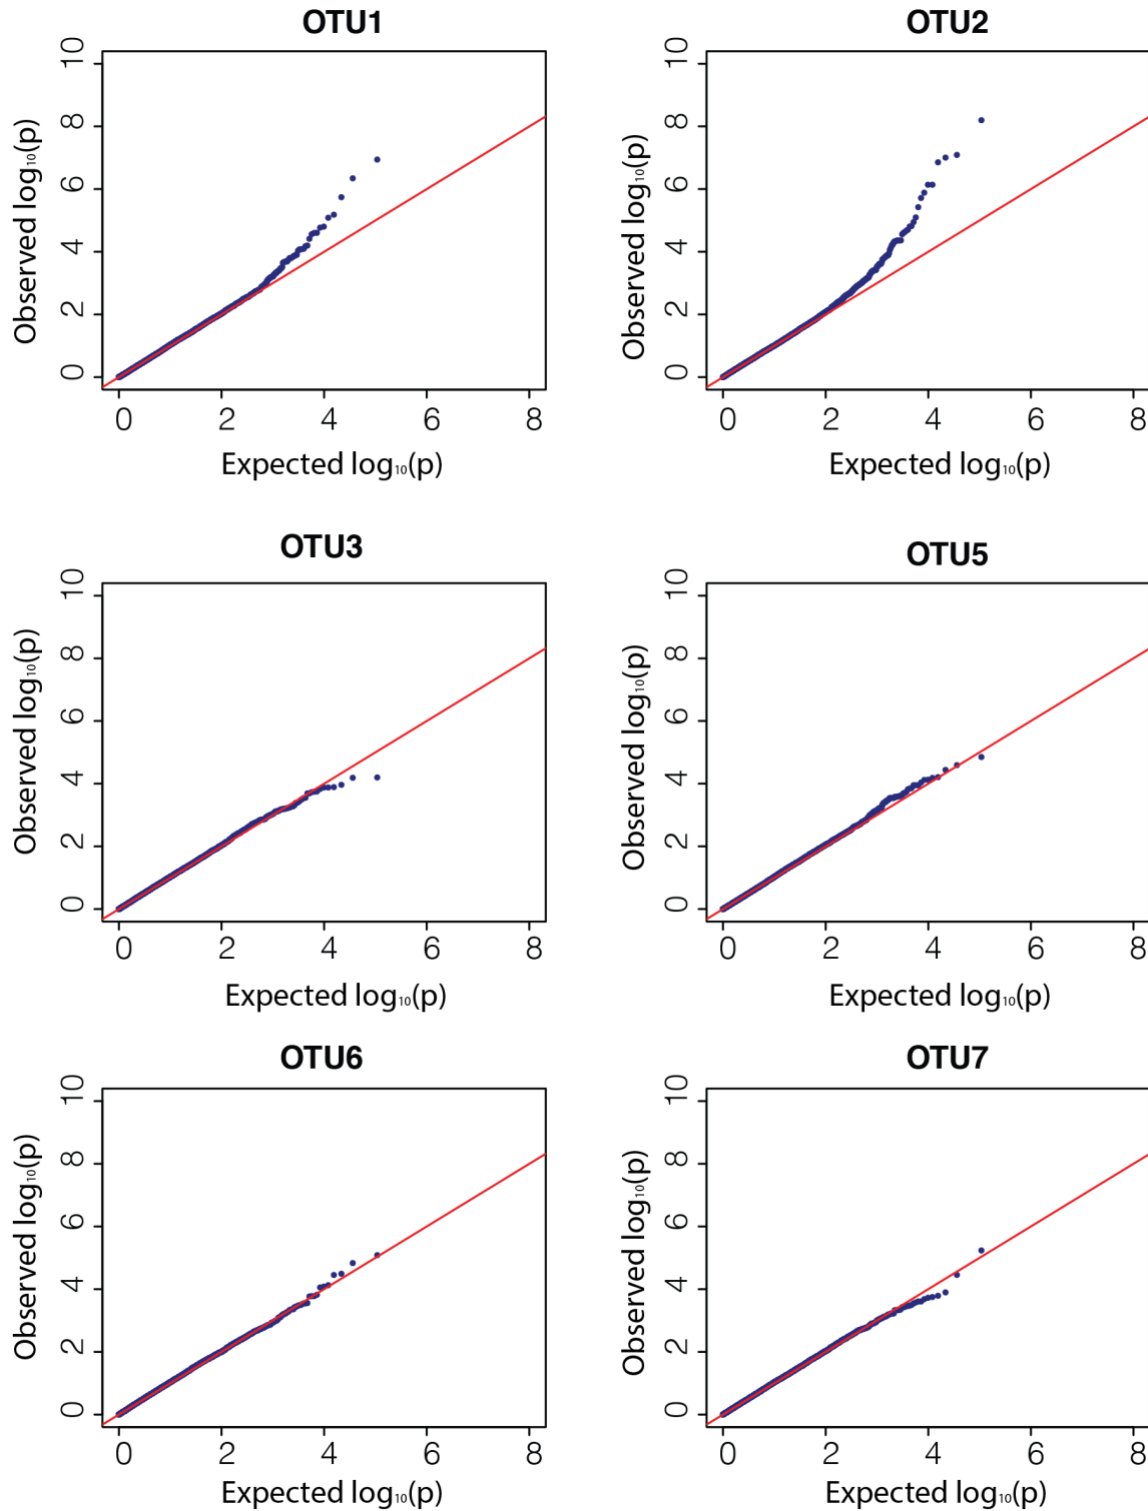

357

358 **Suppl. Fig. 2. Q-Q plots from genome-wide association analyses of the different OTUs.**

359

360

361 Bibliography

- 362 1. Egerton S, Culloty S, Whooley J, Stanton C, Ross RP. The gut microbiota of marine fish.  
363 Front Microbiol. 2018 May 4;9:873.
- 364 2. den Besten G, van Eunen K, Groen AK, Venema K, Reijngoud D-J, Bakker BM. The role of  
365 short-chain fatty acids in the interplay between diet, gut microbiota, and host energy  
366 metabolism. J Lipid Res. 2013 Sep;54(9):2325–40.
- 367 3. Smith CCR, Snowberg LK, Gregory Caporaso J, Knight R, Bolnick DI. Dietary input of  
368 microbes and host genetic variation shape among-population differences in stickleback gut  
369 microbiota. ISME J. 2015 Nov;9(11):2515–26.
- 370 4. Kogut MH, Arsenault RJ. Editorial: gut health: the new paradigm in food animal production.  
371 Front Vet Sci. 2016 Aug 31;3:71.
- 372 5. Limborg MT, Alberdi A, Kodama M, Roggenbuck M, Kristiansen K, Gilbert MTP. Applied  
373 hologenomics: feasibility and potential in aquaculture. Trends Biotechnol. 2018 Jan  
374 31;36(3):252–64.
- 375 6. Dvergedal H, Ødegård J, Øverland M, Mydland LT, Klemetsdal G. Selection for feed  
376 efficiency in Atlantic salmon using individual indicator traits based on stable isotope  
377 profiling. Genet Sel Evol. 2019 Apr 15;51(1):13.
- 378 7. Avershina E, Larsen MG, Aspholm M, Lindback T, Storrø O, Øien T, et al. Culture  
379 dependent and independent analyses suggest a low level of sharing of endospore-forming  
380 species between mothers and their children. Sci Rep. 2020 Feb 4;10(1):1832.
- 381 8. Rudi K, Angell IL, Pope PB, Vik JO, Sandve SR, Snipen L-G. Stable Core Gut Microbiota  
382 across the Freshwater-to-Saltwater Transition for Farmed Atlantic Salmon. Appl Environ  
383 Microbiol. 2018 Jan 15;84(2).
- 384 9. Edgar RC. Search and clustering orders of magnitude faster than BLAST. Bioinformatics.  
385 2010 Oct 1;26(19):2460–1.
- 386 10. Edgar RC. UPARSE: highly accurate OTU sequences from microbial amplicon reads. Nat  
387 Methods. 2013 Oct;10(10):996–8.
- 388 11. Quast C, Pruesse E, Yilmaz P, Gerken J, Schweer T, Yarza P, et al. The SILVA ribosomal  
389 RNA gene database project: improved data processing and web-based tools. Nucleic Acids  
390 Res. 2013 Jan;41(Database issue):D590-6.
- 391 12. VanRaden PM. Efficient methods to compute genomic predictions. J Dairy Sci. 2008  
392 Nov;91(11):4414–23.
- 393 13. Yang J, Zaitlen NA, Goddard ME, Visscher PM, Price AL. Advantages and pitfalls in the  
394 application of mixed-model association methods. Nat Genet. 2014 Feb;46(2):100–6.
- 395 14. Gilmour AR, Gogel BJ, Cullis BR, Welham SJ, Thomson R. ASReml user guide. Hemel  
396 Hempstead: VSN International LTD; 2015.
- 397 15. Holmström C, Kjelleberg S. Marine Pseudoalteromonas species are associated with higher  
398 organisms and produce biologically active extracellular agents. FEMS Microbiol Ecol. 1999



- 399 Dec 1;30(4):285–93.
- 400 16. Wesseling W, Lohmeyer M, Wittka S, Bartels J, Kroll S, Soltmann C, et al. Adverse Effects  
401 of Immobilised *Pseudoalteromonas* on the Fish Pathogenic *Vibrio anguillarum*: An *In Vitro*  
402 Study. *J Mar Biol*. 2016;2016:1–11.
- 403 17. VanInsberghe D, Maas KR, Cardenas E, Strachan CR, Hallam SJ, Mohn WW. Non-  
404 symbiotic Bradyrhizobium ecotypes dominate North American forest soils. *ISME J*. 2015  
405 Nov;9(11):2435–41.
- 406 18. Miranda CD, Zemelman R. Bacterial resistance to oxytetracycline in Chilean salmon  
407 farming. *Aquaculture*. 2002 Sep;212(1–4):31–47.
- 408 19. Koskinen R, Ali-Vehmas T, Kämpfer P, Laurikkala M, Tsitko I, Kostyal E, et al.  
409 Characterization of Sphingomonas isolates from Finnish and Swedish drinking water  
410 distribution systems. *J Appl Microbiol*. 2000 Oct;89(4):687–96.
- 411 20. Rudman SM, Greenblum S, Hughes RC, Rajpurohit S, Kiratli O, Lowder DB, et al.  
412 Microbiome composition shapes rapid genomic adaptation of *Drosophila melanogaster*.  
413 *Proc Natl Acad Sci USA*. 2019 Oct 1;116(40):20025–32.
- 414 21. Wallace RJ, Sasson G, Garnsworthy PC, Tapio I, Gregson E, Bani P, et al. A heritable  
415 subset of the core rumen microbiome dictates dairy cow productivity and emissions. *Sci*  
416 *Adv*. 2019 Jul 3;5(7):eaav8391.
- 417 22. Goodrich JK, Davenport ER, Clark AG, Ley RE. The Relationship Between the Human  
418 Genome and Microbiome Comes into View. *Annu Rev Genet*. 2017 Nov 27;51:413–33.
- 419 23. Sevellec M, Laporte M, Bernatchez A, Derome N, Bernatchez L. Evidence for host effect  
420 on the intestinal microbiota of whitefish ( *Coregonus* sp.) species pairs and their hybrids.  
421 *Ecol Evol*. 2019 Oct 2;
- 422 24. Giatsis C, Sipkema D, Smidt H, Verreth J, Verdegem M. The colonization dynamics of the  
423 gut microbiota in tilapia larvae. *PLoS ONE*. 2014 Jul 29;9(7):e103641.
- 424 25. Glassing A, Dowd SE, Galandiuk S, Davis B, Chiodini RJ. Inherent bacterial DNA  
425 contamination of extraction and sequencing reagents may affect interpretation of microbiota  
426 in low bacterial biomass samples. *Gut Pathog*. 2016 May 26;8:24.
- 427 26. Salter SJ, Cox MJ, Turek EM, Calus ST, Cookson WO, Moffatt MF, et al. Reagent and  
428 laboratory contamination can critically impact sequence-based microbiome analyses. *BMC*  
429 *Biol*. 2014 Nov 12;12:87.
